# Supplementary material
Source: publisher figshare collection journal article supplement (https://frontiersin.figshare.com/ndownloader/files/15008810)

## **Supplementary Tables and Figures**

**Supplementary Table 1: comparison between patients with (SLE-C) or without (SLE-NC) cutaneous lupus erythematosus (both chronic, subacute or acute lesions).**

**Supplementary Table 2: comparison between patients with (SLE-GMN) or without (SLE-NGMN) lupus nephritis**

**Supplementary Table 3: comparison between patients with (SLE-A) or without (SLE-NA) lupus arthritis**

**Supplementary Table 4: comparison between patients with (SLE-Neuro) or without (SLE-NNeuro) neuropsychiatric involvement**

**Supplementary Table 5: comparison between patients with active (SLE-Active) or past clinical manifestation (SLE-Past)**

**Supplementary Table 6: correlation between IL6 and CRP levels**

**Supplementary Figure 1: Representation of IL-1 $\beta$  and IL-6 plasma levels in SLE patients (SLE) compared to healthy controls (HC) and patients with serositis, without SLE.** (A) IL-1 $\beta$  plasma levels were not statistically different between HC and SLE (SLE vs HC =  $6.24 \pm 0.61$  vs  $5.42 \pm 0.38$ ,  $p=0.384$ ) and between SLE and patients with history of serositis, without SLE (SLE vs serositis =  $6.24 \pm 0.61$  vs  $9.42 \pm 2.09$ ,  $p=0.064$ ). On the contrary, patients with serositis presented higher IL-1 $\beta$  plasma levels than HC (serositis vs HC =  $9.42 \pm 2.09$  vs  $5.42 \pm 0.38$ ,  $p=0.014$ ). Unpaired t-test. (B) Subanalysis of SLE patients group, showed that IL-1 $\beta$  plasma levels were not statistically different between patients with history of serositis, without SLE and SLE-NS (serositis vs SLE-NS =  $9.42 \pm 2.09$  vs  $6.39 \pm 1.13$ ,  $p=0.201$ ). On the contrary patients with serositis presented higher IL-1 $\beta$  plasma levels than SLE-S (serositis vs SLE-S =  $9.42 \pm 2.09$  vs  $6.07 \pm 0.38$ ,  $p=0.032$ ). Unpaired t-test. (C) IL-6 plasma levels were not statistically different between HC and patients with history of serositis without SLE (serositis vs HC =  $7.12 \pm 4.12$  vs  $1.58 \pm 0.67$ ,  $p=0.067$ ). On the contrary patients with serositis presented higher IL-6 plasma levels than SLE (serositis vs SLE =  $7.12 \pm 4.12$  vs  $3.09 \pm 0.57$ ,  $p=0.024$ ) were significantly higher in patients with serositis compared both to HC and SLE patients. Unpaired t-test. (D) Subanalysis of SLE patients group, showed that IL-6 plasma levels were not statistically different between patients with history of serositis without SLE and SLE-S (serositis vs SLE-S =

7.12± 4.12 vs 4.8±0.97, p=0.358). On the contrary patients with serositis presented higher IL-6 plasma levels than SLE-NS (serositis vs SLE-NS = 7.12± 4.12 vs 2.02±0.37, p=0.013). Unpaired t-test. \*p < 0.05, \*\*p < 0.01

**Supplementary Figure 2. Representation of IL-1 $\beta$  levels in macrophages supernatants from SLE patients, healthy controls (HC) and patients with serositis without SLE.** (A) IL-1 $\beta$  released from unstimulated macrophages maintained for 5 h in 10% FBS supplemented RPMI was not significantly different between HC, SLE patients and serositis patients (SLE-NS vs serositis= 16.63±5 vs 10.11±2.36, p=0.66; SLE-S vs serositis= 14.82±3.76 vs 10.11±2.36, p= 0.593; HC vs serositis=18.05±7.41 vs 10.11±2.36, p= 0.564). Unpaired t-test. (B) IL-1 $\beta$  released from macrophages stimulated for 4 h with 1  $\mu$ g/ml LPS in 10% FBS supplemented RPMI was not significantly different between all groups of subjects and patients (SLE-NS vs serositis= 48.11±14.53 vs 48.75±17.33, p=0.99; SLE-S vs serositis= 55.38±13.47 vs 48.75±17.33, p= 0.83; HC vs serositis= 62.28±15.09 vs 48.75±17.33, p=0.67). Unpaired t-test. (C) IL-1 $\beta$  released from macrophages stimulated for 4 h with 1  $\mu$ g/ml LPS and for 1 h with 300  $\mu$ M BzATP in 10% FBS supplemented RPMI was not significantly different between HC and all the groups of patients (SLE-NS vs HC= 1237±70.39 vs 1246±58.61, p=0.936; SLE-S vs HC= 988.7±103.6 vs 1246±58.61, p= 0.072; serositis vs HC= 1402±104.4 vs 1246±58.61 p= 0.82; SLE-NS vs serositis= 1237±70.39 vs 1402±104.4, p=0.326). IL-1 $\beta$  release was on the contrary significantly lower in SLE-S compared to both SLE-NS (p=0.048) and serositis (p= 0.045). Unpaired t-test. (D) IL-1 $\beta$  released from macrophages stimulated for 1 h with 300  $\mu$ M BzATP in 10% FBS supplemented RPMI was significantly lower in SLE patients respect to both HC and patients with serositis without SLE (SLE-NS vs serositis= 63.91±18.94 vs 318.7±125.8, p=0.0008; SLE-S vs serositis= 59.29±24.02 vs 318.7±125.8, p=0.047). No significant difference was found between HC and serositis patients (p=0.303). Unpaired t-test. Data are means ±SD. Only significant differences are shown. \*p < 0.05, \*\*p < 0.01, \*\*\* p < 0.005.

**Supplementary Figure 3: representation of IL-6 levels in macrophages supernatants from SLE patients, healthy controls (HC) and patients with serositis without SLE.** (A) IL-6 released from unstimulated macrophages maintained for 5 h in 10% FBS supplemented RPMI was not significantly different between HC and SLE patients vs serositis without SLE (SLE-NS vs serositis= 329.0±83.74 vs 14.37±1.71, p=0.21; SLE-S vs serositis= 29.18±5.66 vs 14.37±1.71, p= 0.18; HC vs serositis =11.83±0.51vs 14.37±1.71, p= 0.55). Unpaired t-test. (B) IL-6 released from macrophages stimulated for 4 h with 1  $\mu$ g/ml LPS in 10% FBS-supplemented RPMI was not significantly different between HC and SLE-S patients vs serositis (SLE-S vs serositis= 728.8±101.2vs 811.1±110.73, p= 0.12; HC

vs serositis=  $339.9 \pm 41.37$  vs  $811.1 \pm 110.73$ ,  $p=0.63$ ). On the contrary IL-6 released was significantly lower in patients with serositis respect to SLE-NS (SLE-NS vs serositis=  $1172 \pm 74.25$  vs  $811.1 \pm 110.73$ ,  $p=0.0002$ . Unpaired t-test. (C) IL-6 released from macrophages stimulated for 4 h with  $1 \mu\text{g/ml}$  LPS and for 1 h with  $500 \mu\text{M}$  BzATP in 10% FBS-supplemented RPMI was not different between SLE patients vs serositis (SLE-NS vs serositis=  $1159 \pm 83.87$  vs  $858.61 \pm 133.93$ ,  $p=0.10$ ; SLE-S vs serositis=  $719.7 \pm 112.6$  vs  $858.61 \pm 133.93$ ,  $p=0.56$ ) and was significantly lower in HC compared to serositis (HC vs serositis=  $330.7 \pm 43.46$  vs  $858.61 \pm 133.93$ ,  $p=0.0001$ ). Unpaired t-test. (D) IL-6 released from macrophages stimulated for 1 h with  $500 \mu\text{M}$  BzATP in 10% FBS-supplemented RPMI was not significantly different between HC and SLE patients vs serositis without SLE (SLE-NS vs serositis=  $328 \pm 92.1$  vs  $75.32 \pm 58.52$ ,  $p=0.08$ ; SLE-S vs serositis=  $43.95 \pm 9.49$  vs  $75.32 \pm 58.52$ ,  $p=0.75$ ; HC vs serositis=  $13.38 \pm 0.76$  vs  $75.32 \pm 58.52$ ,  $p=0.07$ ). Unpaired t-test. Data are means  $\pm$  SE. Only significant differences are shown. \* $p < 0.05$ , \*\* $p < 0.01$ , \*\*\* $p < 0.005$ , \*\*\*\* $p < 0.001$ .

#### **Supplementary Figure 4: evaluation of Calcium influx with Fura2 in PBMCs after BzATP stimulation**

The increase of  $[\text{Ca}^{2+}]_i$  ( $\Delta[\text{Ca}^{2+}]_i$ ) following stimulation with  $500 \mu\text{M}$  BzATP was significantly higher in PBMCs from patients with serositis without SLE respect to HC (serositis vs HC=  $191.8 \pm 38$  vs  $105.5 \pm 12.75$ ;  $p=0.008$ ) and SLE patients both SLE-S (serositis vs SLE-S=  $191.8 \pm 38$  vs  $58.25 \pm 10.28$ ;  $p=0.0016$ ) and SLE-NS (serositis vs SLE-NS=  $191.8 \pm 38$  vs  $67.69 \pm 9.23$ ;  $p=0.0005$ ) \* $p < 0.05$ , \*\* $p < 0.01$ , \*\*\* $p < 0.005$ .

**Supplementary Table 1**

|                                                                                                     | <b>SLE-C<br/>(37;77%)</b> | <b>SLE-NC<br/>(11;23%)</b> | <b>p</b>           |
|-----------------------------------------------------------------------------------------------------|---------------------------|----------------------------|--------------------|
| <b>IL-1<math>\beta</math> plasma levels pg/ml; mean <math>\pm</math>SD</b>                          | 2.36 $\pm$ 0.21           | 2.65 $\pm$ 0.68            | 0.52               |
| <b>IL-6 plasma levels pg/ml; mean <math>\pm</math>SD</b>                                            | 1.38 $\pm$ 0.70           | 3.23 $\pm$ 1.55            | <b><u>0.03</u></b> |
| <b>IL-1<math>\beta</math> levels in macrophages supernatants<br/>pg/ml; mean <math>\pm</math>SD</b> |                           |                            |                    |
| RPMI                                                                                                | 97.78 $\pm$ 139.26        | 35.36 $\pm$ 29.12          | 0.26               |
| LPS                                                                                                 | 160.71 $\pm$ 176.69       | 125.34 $\pm$ 148.77        | 0.58               |
| LPS + BzATP                                                                                         | 2313.05 $\pm$ 648.47      | 2528.43 $\pm$ 751.38       | 0.42               |
| BZATP                                                                                               | 109.84 $\pm$ 137.59       | 123.10 $\pm$ 162.60        | 0.82               |
| <b>IL-6 levels in macrophages supernatants<br/>pg/ml; mean <math>\pm</math>SD</b>                   |                           |                            |                    |
| RPMI                                                                                                | 667.29 $\pm$ 874.65       | 647.88 $\pm$ 833.80        | 0.95               |
| LPS                                                                                                 | 2334.89 $\pm$ 760.98      | 2352.66 $\pm$ 755.54       | 0.95               |
| LPS + BzATP                                                                                         | 2456.65 $\pm$ 937.93      | 2169.47 $\pm$ 726.70       | 0.40               |
| BZATP                                                                                               | 739.89 $\pm$ 1004.26      | 565.06 $\pm$ 875.74        | 0.65               |
| <b><math>\Delta</math>Ca<sup>2+</sup> (Fura2) nM <math>\pm</math>SD</b>                             | 65.4 $\pm$ 16.8           | 69.12 $\pm$ 41.59          | 0.85               |
| <b>RT-PCR P2X7R mean <math>\pm</math>SD</b>                                                         | 0.85 $\pm$ 0.44           | 1.19 $\pm$ 0.40            | 0.28               |
| <b>RT-PCR NLRP3 mean <math>\pm</math>SD</b>                                                         | 3.05 $\pm$ 1.99           | 4.46 $\pm$ 2.32            | 0.35               |

*t-test and Mann Whitney test*

**Supplementary Table 2**

|                                                                                                     | <b>SLE-GMN<br/>(11; 34.4%)</b> | <b>SLE-NGMN<br/>(21;65.6%)</b> | <b>p</b>            |
|-----------------------------------------------------------------------------------------------------|--------------------------------|--------------------------------|---------------------|
| <b>IL-1<math>\beta</math> plasma levels pg/ml; mean <math>\pm</math>SD</b>                          | 2.4 $\pm$ 0.12                 | 2.5 $\pm$ 0.2                  | 0.63                |
| <b>IL-6 plasma levels pg/ml; mean <math>\pm</math>SD</b>                                            | 1.63 $\pm$ 0.77                | 1.85 $\pm$ 1.31                | 0.84                |
| <b>IL-1<math>\beta</math> levels in macrophages supernatants<br/>pg/ml; mean <math>\pm</math>SD</b> |                                |                                |                     |
| RPMI                                                                                                | 27.0 $\pm$ 10.5                | 58.8 $\pm$ 91.0                | 0.58                |
| LPS                                                                                                 | 63.5 $\pm$ 17.8                | 155.6 $\pm$ 165.2              | 0.55                |
| LPS + BzATP                                                                                         | 645.3 $\pm$ 189.2              | 2270.1 $\pm$ 760.1             | <b><u>0.003</u></b> |
| BZATP                                                                                               | 155.8 $\pm$ 116.8              | 109.6 $\pm$ 141.1              | 0.21                |
| <b>IL-6 levels in macrophages supernatants<br/>pg/ml; mean <math>\pm</math>SD</b>                   |                                |                                |                     |
| RPMI                                                                                                | 961.93 $\pm$ 1091.95           | 419.16 $\pm$ 455.35            | 0.11                |
| LPS                                                                                                 | 2317.68 $\pm$ 923.0            | 2363.64 $\pm$ 601.15           | 0.88                |
| LPS + BzATP                                                                                         | 2399.69 $\pm$ 916.57           | 2255.25 $\pm$ 801.48           | 0.67                |
| BZATP                                                                                               | 913.28 $\pm$ 1166.03           | 435.81 $\pm$ 647.58            | 0.22                |
| <b><math>\Delta</math>Ca<sup>2+</sup> (Fura2) nM <math>\pm</math>SD</b>                             | 56.25 $\pm$ 55.09              | 72.78 $\pm$ 20.69              | 0.43                |
| <b>RT-PCR P2X7R mean <math>\pm</math>SD</b>                                                         | 1.06 $\pm$ 0.36                | 0.9 $\pm$ 0.48                 | 0.61                |
| <b>RT-PCR NLRP3 mean <math>\pm</math>SD</b>                                                         | 3.86 $\pm$ 2.31                | 3.31 $\pm$ 2.14                | 0.72                |

*t*-test and Mann Whitney test

**Supplementary Table 3**

|                                                                                                 | <b>SLE-A (31;64,6%)</b> | <b>SLE-NA (17; 35,4%)</b> | <b>p</b>           |
|-------------------------------------------------------------------------------------------------|-------------------------|---------------------------|--------------------|
| <b>IL-1<math>\beta</math> plasma levels pg/ml; mean <math>\pm</math>SD</b>                      | 2.4 $\pm$ 0.12          | 4 $\pm$ 0.2               | 0.63               |
| <b>IL-6 plasma levels pg/ml; mean <math>\pm</math>SD</b>                                        | 2.16 $\pm$ 1.31         | 1.34 $\pm$ 0.93           | 0.32               |
| <b>IL-1<math>\beta</math> levels in macrophages supernatants pg/ml; mean <math>\pm</math>SD</b> |                         |                           |                    |
| RPMI                                                                                            | 86.8 $\pm$ 132.20       | 48.74 $\pm$ 63.23         | 0.51               |
| LPS                                                                                             | 149.89 $\pm$ 180.28     | 135.19 $\pm$ 129.92       | 0.83               |
| LPS + BzATP                                                                                     | 2468.07 $\pm$ 586.91    | 2296.88 $\pm$ 908.7       | 0.55               |
| BZATP                                                                                           | 113.54 $\pm$ 132.91     | 121.59 $\pm$ 181.61       | 0.89               |
| <b>IL-6 levels in macrophages supernatants pg/ml; mean <math>\pm</math>SD</b>                   |                         |                           |                    |
| RPMI                                                                                            | 518.59 $\pm$ 804.75     | 905.77 $\pm$ 884.03       | 0.27               |
| LPS                                                                                             | 2432.41 $\pm$ 822.02    | 2345.22 $\pm$ 621.94      | 0.99               |
| LPS + BzATP                                                                                     | 2273.69 $\pm$ 863.72    | 2400.77 $\pm$ 836.33      | 0.72               |
| BZATP                                                                                           | 482.82 $\pm$ 839.27     | 963.81 $\pm$ 1027.74      | 0.21               |
| <b><math>\Delta</math>Ca<sup>2+</sup> (Fura2) nM <math>\pm</math>SD</b>                         | 70.75 $\pm$ 36.05       | 62.8 $\pm$ 31.6           | 0.69               |
| <b>RT-PCR P2X7R mean <math>\pm</math>SD</b>                                                     | 0.74 $\pm$ 0.35         | 1.43 $\pm$ 0.04           | <b><u>0.01</u></b> |
| <b>RT-PCR NLRP3 mean <math>\pm</math>SD</b>                                                     | 2.99 $\pm$ 1.86         | 4.59 $\pm$ 2.49           | 0.28               |

*t*-test and Mann Whitney test

**Supplementary Table 4**

|                                                                                                 | <b>SLE-Neuro<br/>(9;18;8%)</b> | <b>SLE-NNeuro<br/>(39; 81,2%)</b> | <b>p</b>           |
|-------------------------------------------------------------------------------------------------|--------------------------------|-----------------------------------|--------------------|
| <b>IL-1<math>\beta</math> plasma levels pg/ml; mean <math>\pm</math>SD</b>                      | 3.15 $\pm$ 1.2                 | 2.45 $\pm$ 0.21                   | 0.50               |
| <b>IL-6 plasma levels pg/ml; mean <math>\pm</math>SD</b>                                        | 2.6 $\pm$ 1.6                  | 1.4 $\pm$ 0.76                    | 0.15               |
| <b>IL-1<math>\beta</math> levels in macrophages supernatants pg/ml; mean <math>\pm</math>SD</b> |                                |                                   |                    |
| RPMI                                                                                            | 18.4 $\pm$ 2.26                | 81.41 $\pm$ 119.52                | 0.47               |
| LPS                                                                                             | 74.16 $\pm$ 103.25             | 157.31 $\pm$ 169.67               | 0.35               |
| LPS + BzATP                                                                                     | 1720.36 $\pm$ 833.53           | 2528.49 $\pm$ 613.68              | <b><u>0.03</u></b> |
| BZATP                                                                                           | 113.88 $\pm$ 173.88            | 116.63 $\pm$ 146.75               | 0.97               |
| <b>IL-6 levels in macrophages supernatants pg/ml; mean <math>\pm</math>SD</b>                   |                                |                                   |                    |
| RPMI                                                                                            | 257.88 $\pm$ 357.54            | 734.18 $\pm$ 855.55               | 0.31               |
| LPS                                                                                             | 2278.5 $\pm$ 766.94            | 2355.78 $\pm$ 756.49              | 0.85               |
| LPS + BzATP                                                                                     | 1910.2 $\pm$ 460.23            | 2396.63 $\pm$ 878.92              | 0.29               |
| BZATP                                                                                           | 214.97 $\pm$ 301.32            | 739.97 $\pm$ 978.52               | 0.30               |
| <b><math>\Delta</math>Ca<sup>2+</sup> (Fura2) nM <math>\pm</math>SD</b>                         | 87 $\pm$ 20.5                  | 61.9 $\pm$ 34.95                  | 0.26               |
| <b>RT-PCR P2X7R mean <math>\pm</math>SD</b>                                                     | 1.03 $\pm$ 0.57                | 0.85 $\pm$ 0.38                   | 0.56               |
| <b>RT-PCR NLRP3 mean <math>\pm</math>SD</b>                                                     | 3.8 $\pm$ 4.24                 | 3.28 $\pm$ 1.61                   | 0.73               |

*t-test and Mann Whitney test*

**Supplementary Table 5**

|                                                                                                     | <b>SLE-Active<br/>(16;33.3%)</b> | <b>SLE-Past<br/>(32; 66.7%)</b> | <b>p</b> |
|-----------------------------------------------------------------------------------------------------|----------------------------------|---------------------------------|----------|
| <b>IL-1<math>\beta</math> plasma levels pg/ml; mean <math>\pm</math>SD</b>                          | 2.7 $\pm$ 0.7                    | 2.32 $\pm$ 0.2                  | 0.31     |
| <b>IL-6 plasma levels pg/ml; mean <math>\pm</math>SD</b>                                            | 2.1 $\pm$ 2.1                    | 3.2 $\pm$ 2.1                   | 0.39     |
| <b>IL-1<math>\beta</math> levels in macrophages<br/>supernatants pg/ml; mean <math>\pm</math>SD</b> |                                  |                                 |          |
| RPMI                                                                                                | 33.1 $\pm$ 28.9                  | 67.4 $\pm$ 192.9                | 0.36     |
| LPS                                                                                                 | 147.9 $\pm$ 202.4                | 151.6 $\pm$ 150.7               | 0.94     |
| LPS + BzATP                                                                                         | 2256.3 $\pm$ 615.3               | 2227.6 $\pm$ 826.7              | 0.93     |
| BZATP                                                                                               | 63.7 $\pm$ 84.7                  | 129.2 $\pm$ 156.5               | 0.18     |
| <b>IL-6 levels in macrophages supernatants<br/>pg/ml; mean <math>\pm</math>SD</b>                   |                                  |                                 |          |
| RPMI                                                                                                | 324.8 $\pm$ 405.7                | 489.1 $\pm$ 821.4               | 0.53     |
| LPS                                                                                                 | 1866.9 $\pm$ 536.7               | 2087.6 $\pm$ 951.8              | 0.47     |
| LPS + BzATP                                                                                         | 1610.9 $\pm$ 551.4               | 2157.2 $\pm$ 1011.9             | 0.10     |
| BZATP                                                                                               | 227.0 $\pm$ 304.7                | 539.5 $\pm$ 894.8               | 0.26     |
| <b><math>\Delta</math>Ca<sup>2+</sup> (Fura2) nM <math>\pm</math>SD</b>                             | 67.8 $\pm$ 38.7                  | 64.6 $\pm$ 29.5                 | 0.85     |
| <b>RT-PCR P2X7R mean <math>\pm</math>SD</b>                                                         | 0.49 $\pm$ 0.2                   | 0.97 $\pm$ 0.4                  | 0.054    |

*t-test and Mann Whitney test*



Supplementary Table 6

| IL-6                 |               |              |              |              |              |
|----------------------|---------------|--------------|--------------|--------------|--------------|
|                      | Plasma        | RPMI         | LPS          | LPS- BzATP   | BZATP        |
| CRP                  | -0.07; p=0.79 | 0.05; p=0.75 | 0.61; p=0.06 | 0.72; p=0.15 | 0.15; p=0.34 |
| Spearman correlation |               |              |              |              |              |

Supplementary Figure 1

(A)

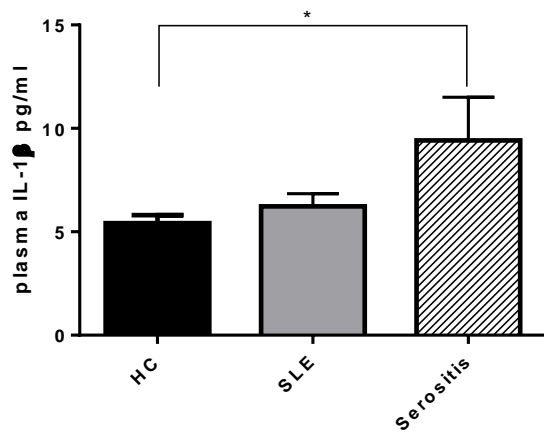

(B)

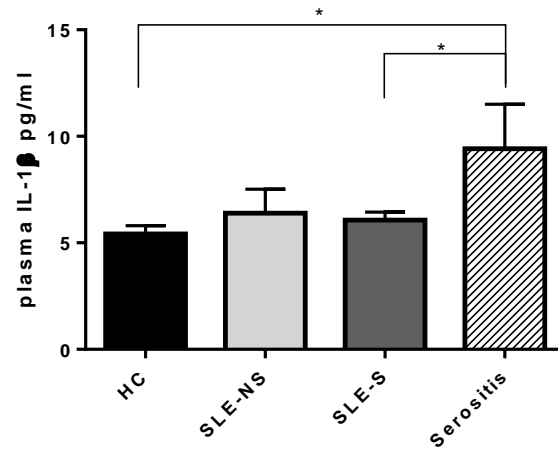

(C)

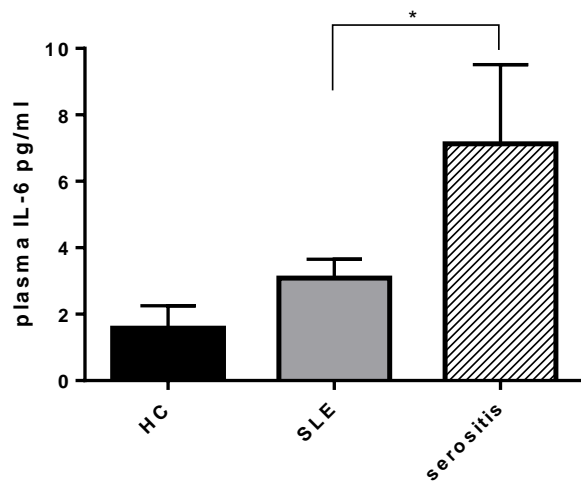

(D)

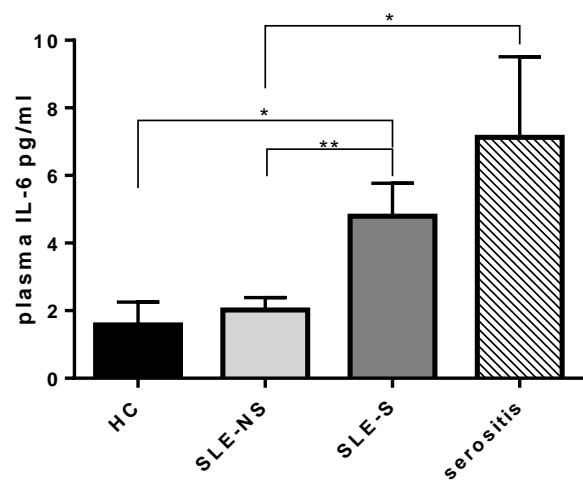

Supplementary Figure 2

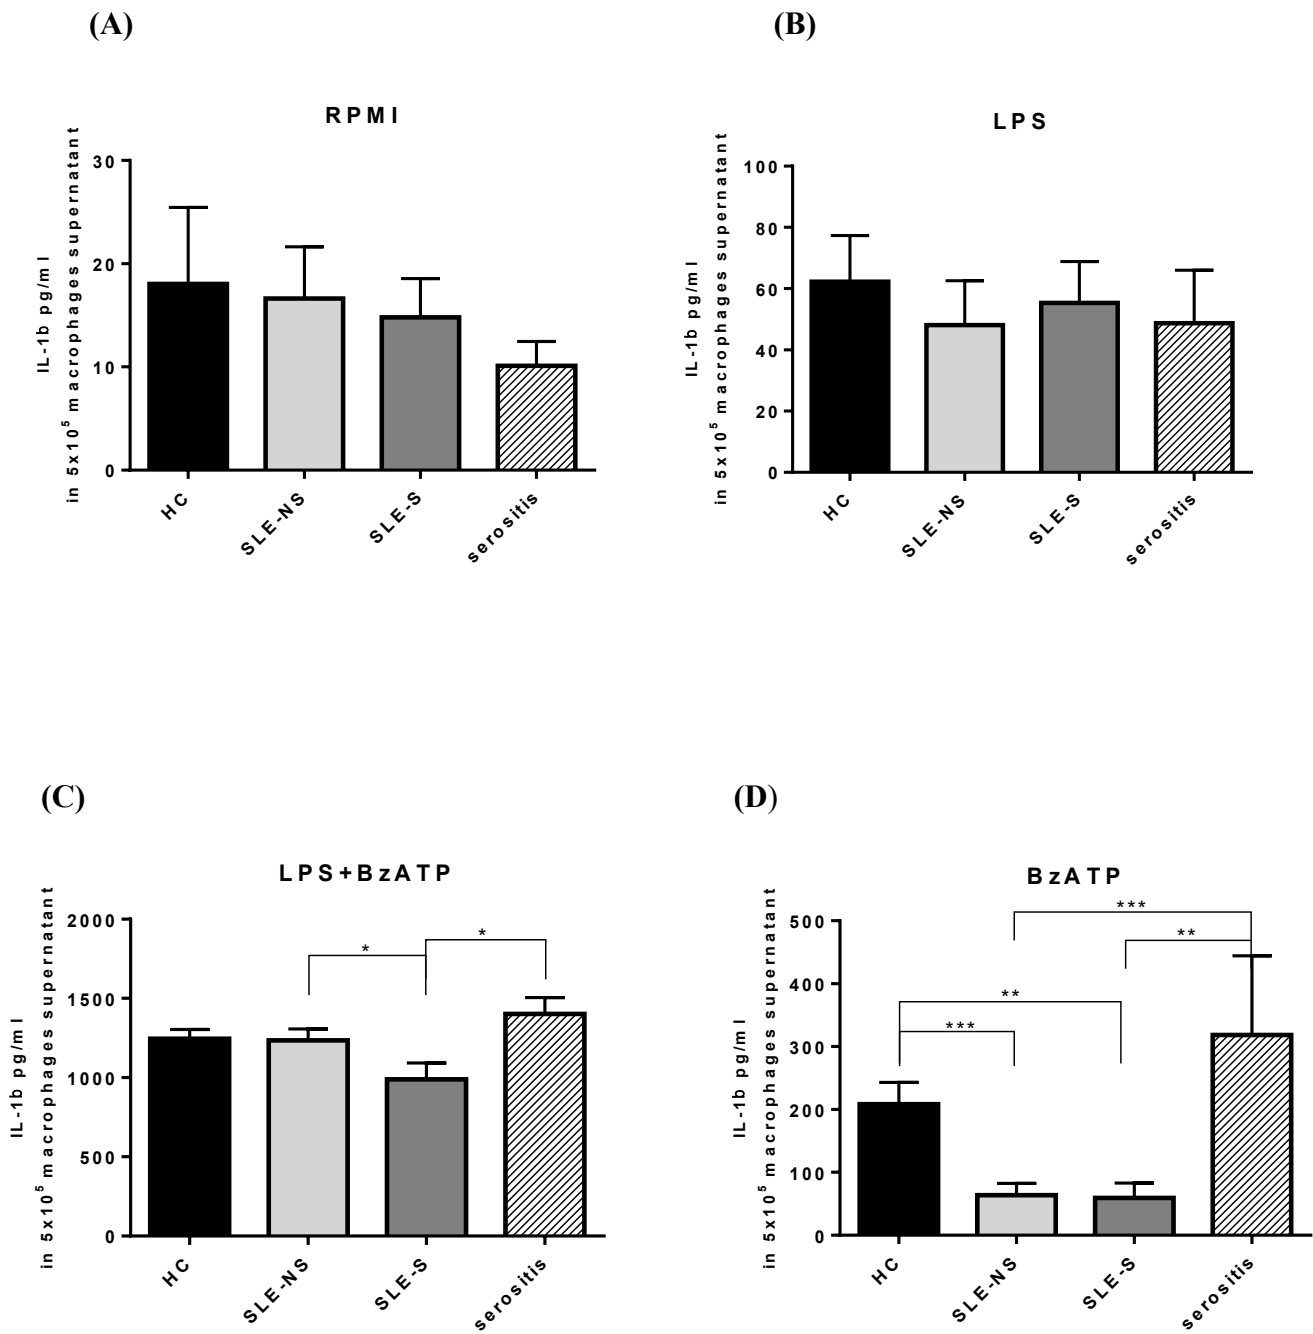

Supplementary Figure 3

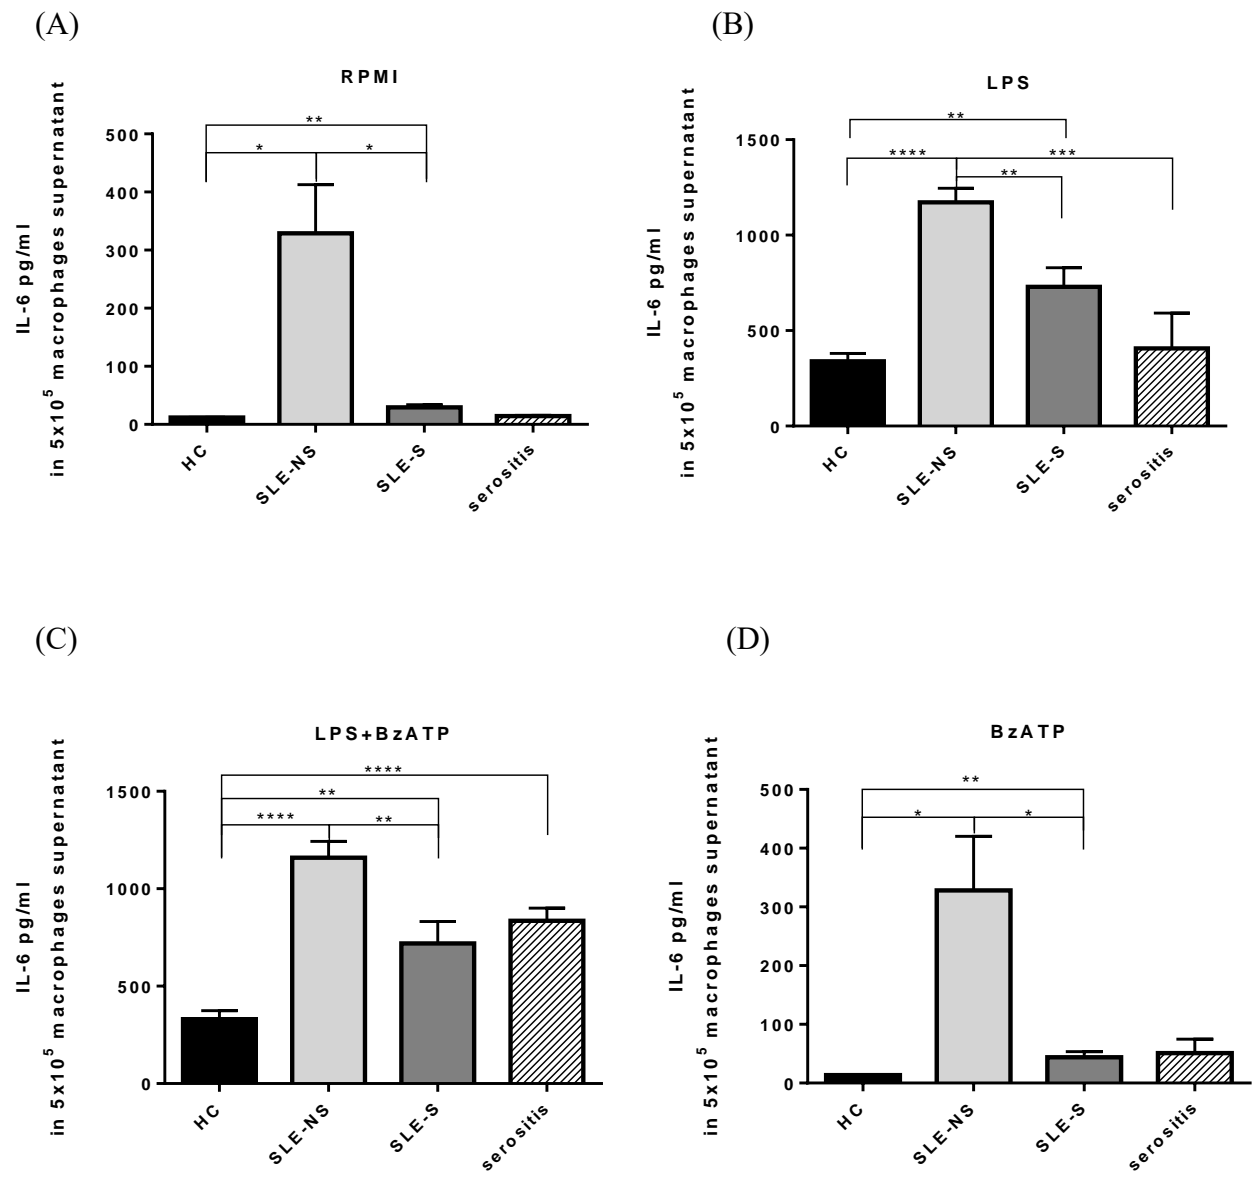

Supplementary Figure 4

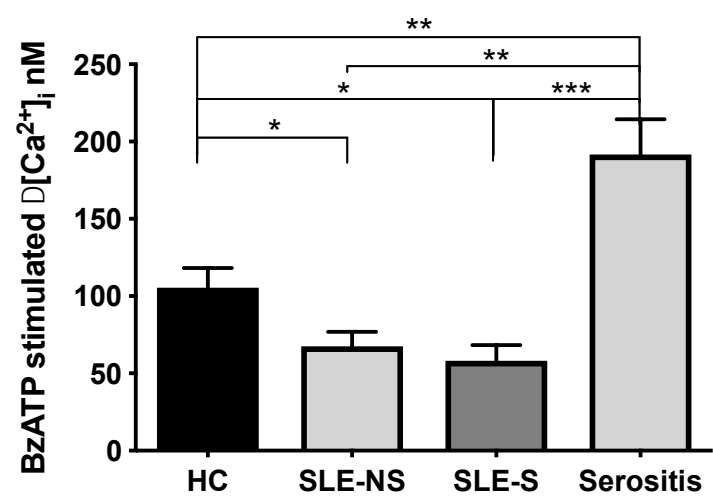

Supplement: Supplementary file [file 15008810]
